# Supplementary material for: A simplified approach using Taqman low-density array for medulloblastoma subgrouping
Source: Springer Nature journal article supplement (doi:10.1186/s40478-019-0681-y), 2019-03-04
Supplement: MOESM3 [file 25666680]

S1

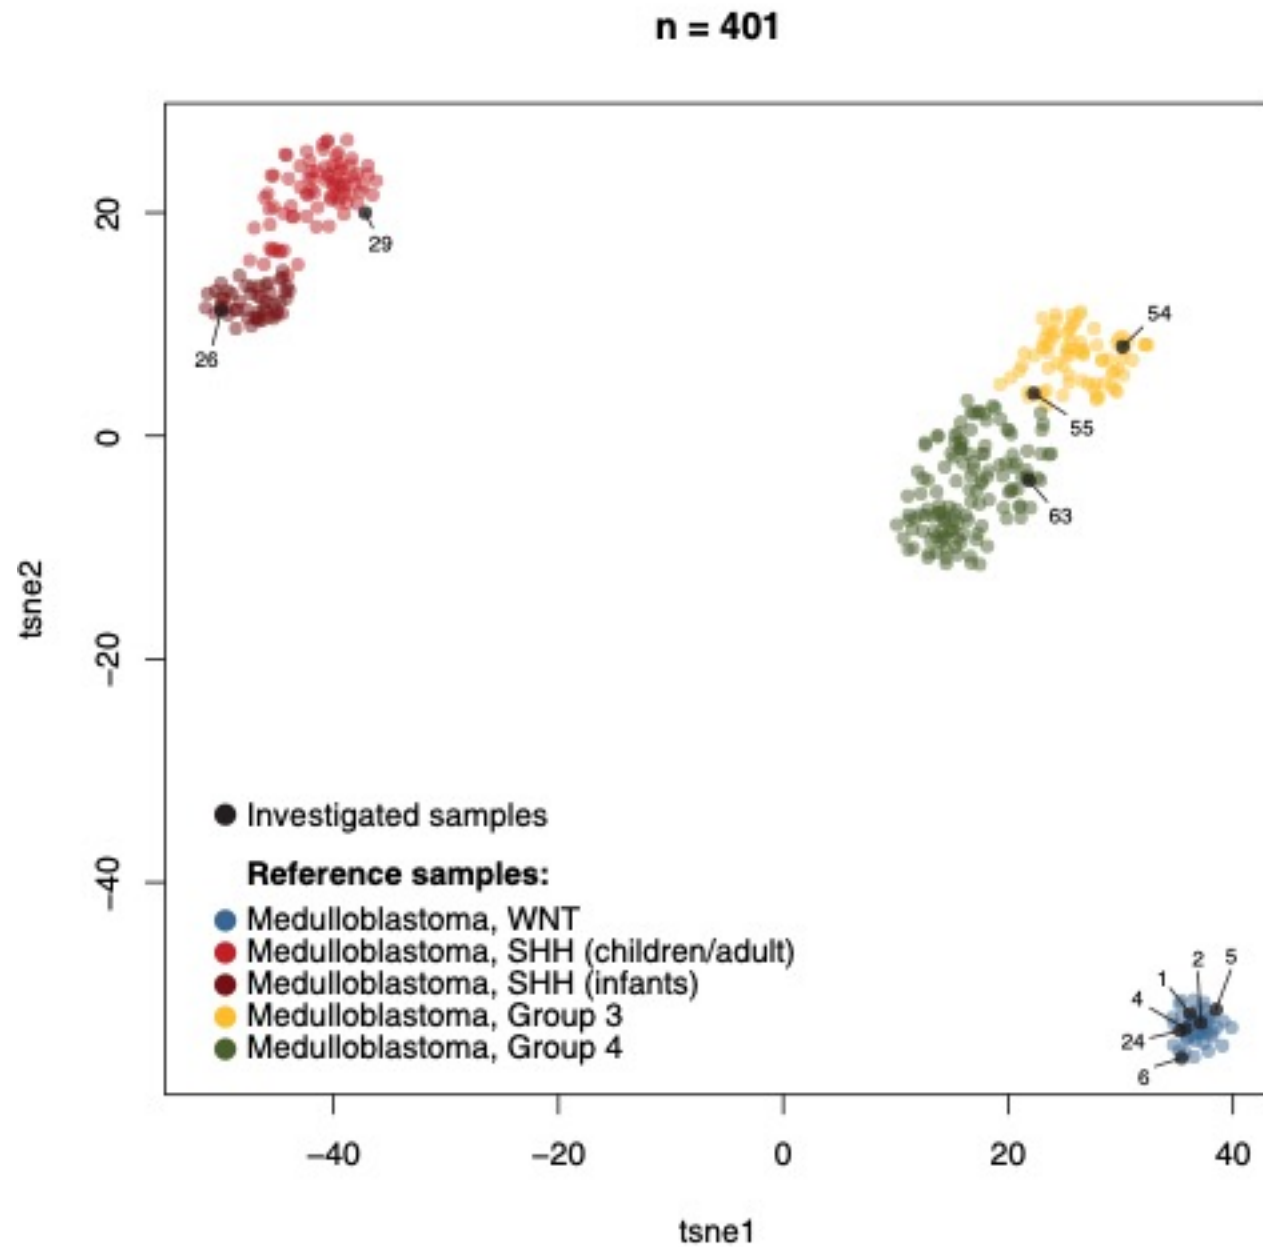

**Fig. S1** t-SNE map show molecular assignment by Methylation array 450K of 11 MB samples from our study along with 390 MB samples from GSE109381.
