# Supplementary material for: A simplified approach using Taqman low-density array for medulloblastoma subgrouping
Source: Springer Nature journal article supplement (doi:10.1186/s40478-019-0681-y), 2019-03-04
Supplement: MOESM5 [file 25666680]

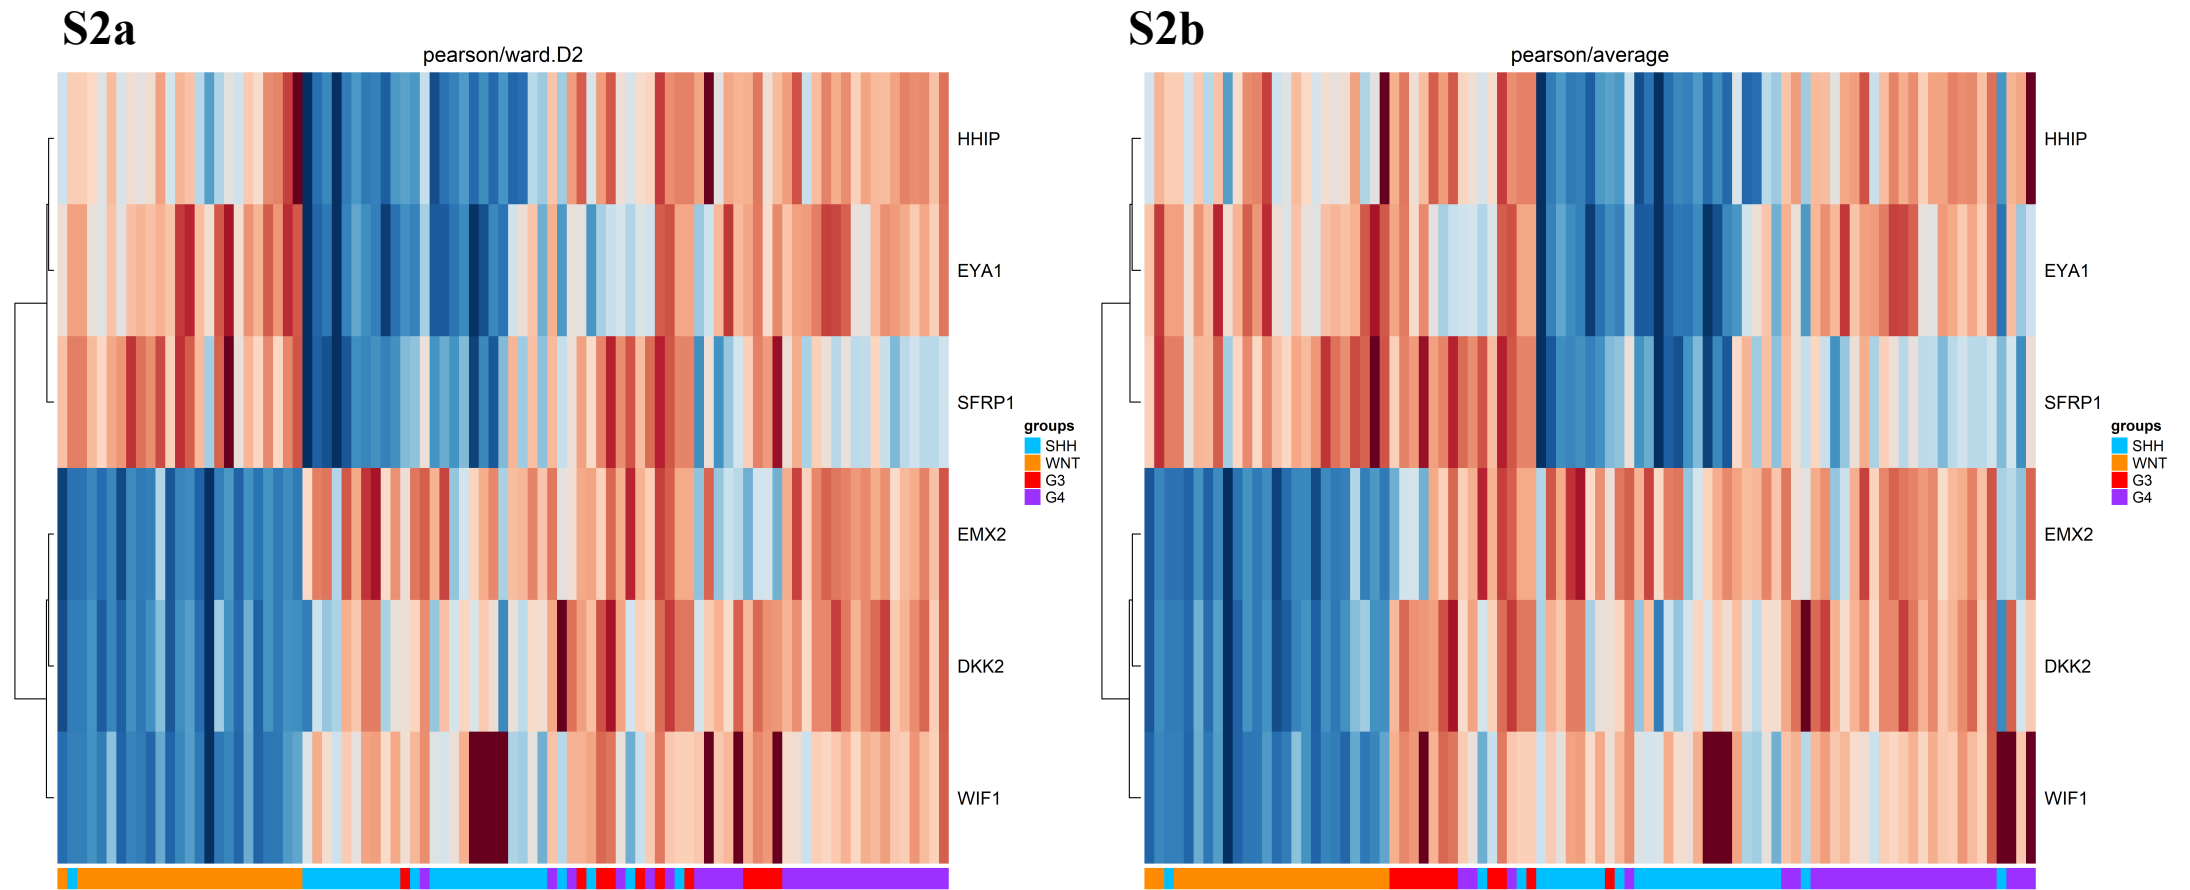

**Fig. S2.** Comparison of clustering algorithms in our study (n=92) with 6 genes *HHIP*, *EYA1*, *SFRP1*, *EMX2*, *DKK2*, *WIF1*. **(a)** Ward.D2 algorithms **(b)** Average-linkage algorithms.
