# Supplementary material for: A simplified approach using Taqman low-density array for medulloblastoma subgrouping
Source: Springer Nature journal article supplement (doi:10.1186/s40478-019-0681-y), 2019-03-04
Supplement: MOESM6 [file 25666680]

S3a

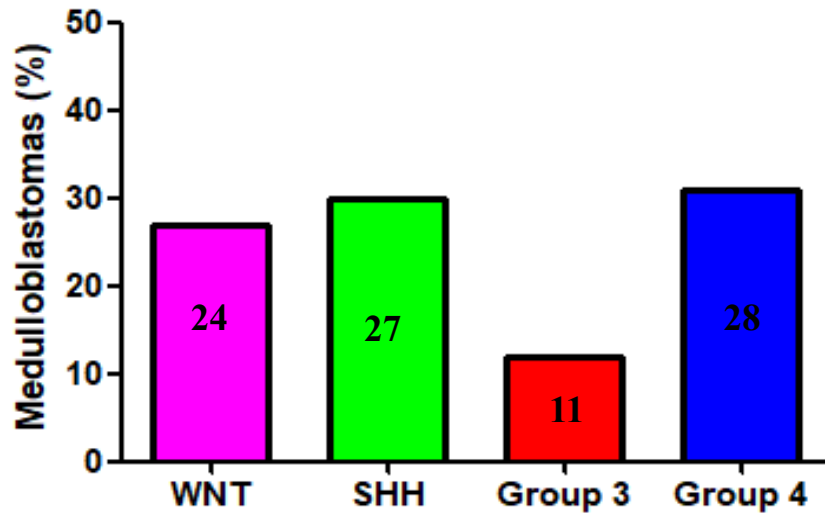

S3b

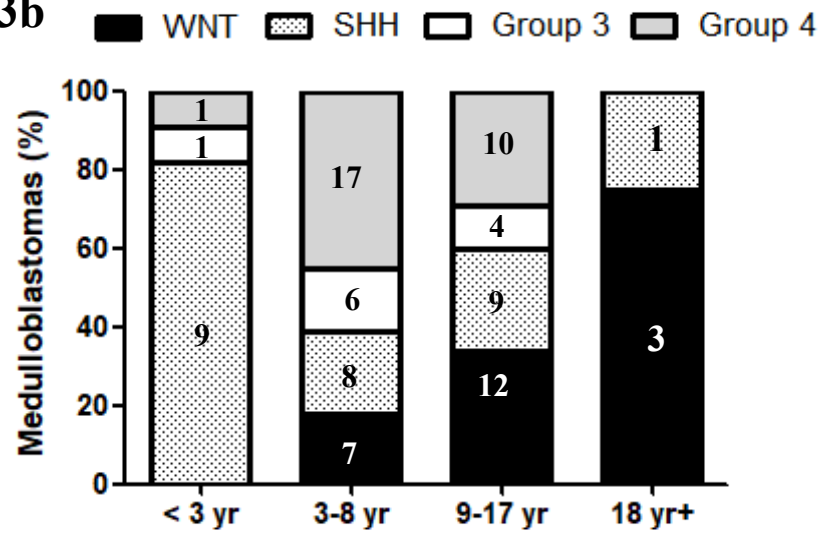

S3c

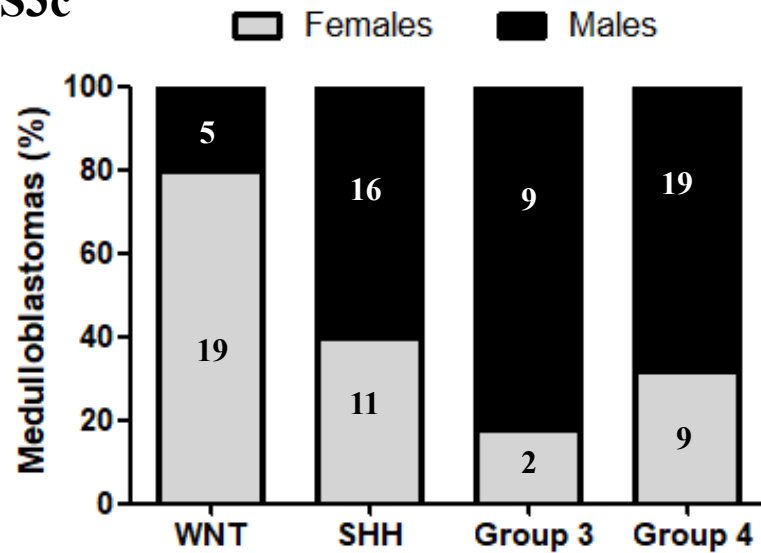

S3d

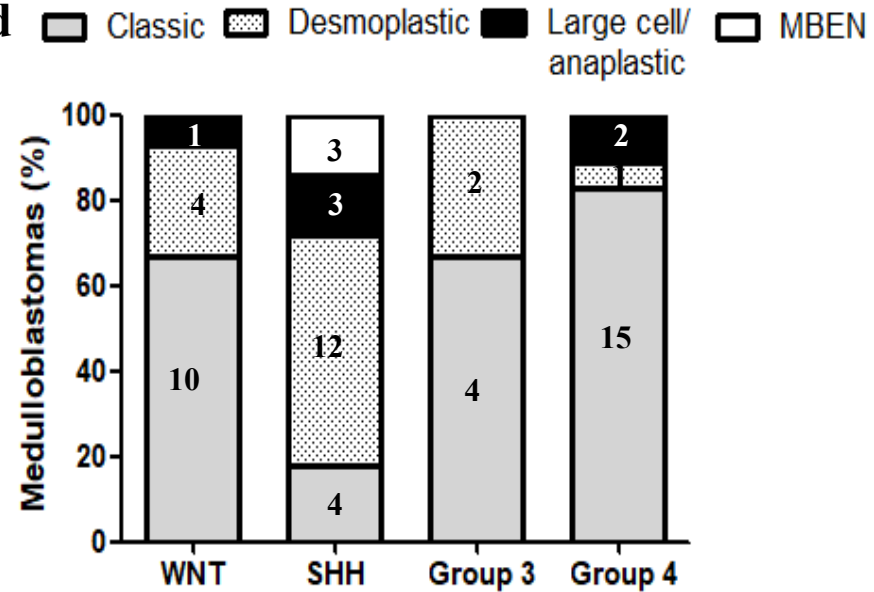

**Fig. S3** (a) Demographic distribution of the 4 molecular subgroups in the present cohort; (b) subgroup distribution with respect to age at diagnosis; (c) gender; (d) histological variants. The numbers indicate the sum of tumors in each category.
