# Supplementary material for: A simplified approach using Taqman low-density array for medulloblastoma subgrouping
Source: Springer Nature journal article supplement (doi:10.1186/s40478-019-0681-y), 2019-03-04
Supplement: MOESM7 [file 25666680]

S4

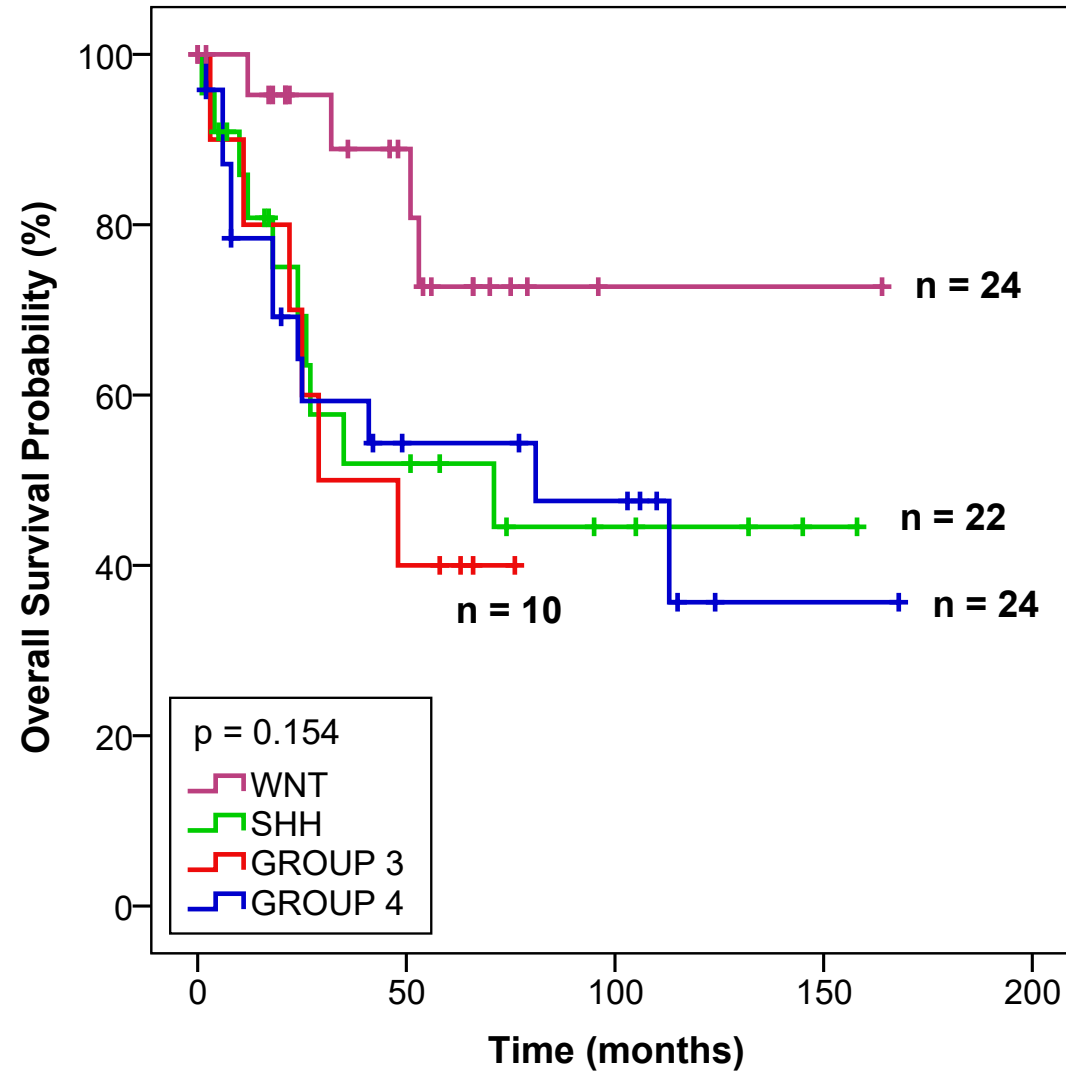

Fig. S4 Overall survival of molecular subgroups ( n=80 )
